# Supplementary material for: Genome-wide association study and meta-analysis find that over 40 loci affect risk of type 1 diabetes
Source: Springer Nature journal article supplement (doi:10.1038/ng.381), 2009-05-10
Supplement: 41588_2009_BFng381_MOESM12_ESM.pdf [file 41588_2009_BFng381_MOESM12_ESM.pdf]

Supplementary Information for:

Genome-wide association study and meta-analysis  
indicates that over 40 loci affect risk of type 1  
diabetes

Jeffrey C. Barrett, David Clayton, Patrick Concannon, Beena Akolkar, Jason D. Cooper, Henry A. Erlich, Cécile Julier, Grant Morahan, Jørn Nerup, Concepcion Nierras, Vincent Plagnol, Flemming Pociot, Helen Schuilenburg, Deborah J. Smyth, Helen Stevens, John A. Todd, Neil M. Walker, Stephen S. Rich, and the Type 1 Diabetes Genetics Consortium

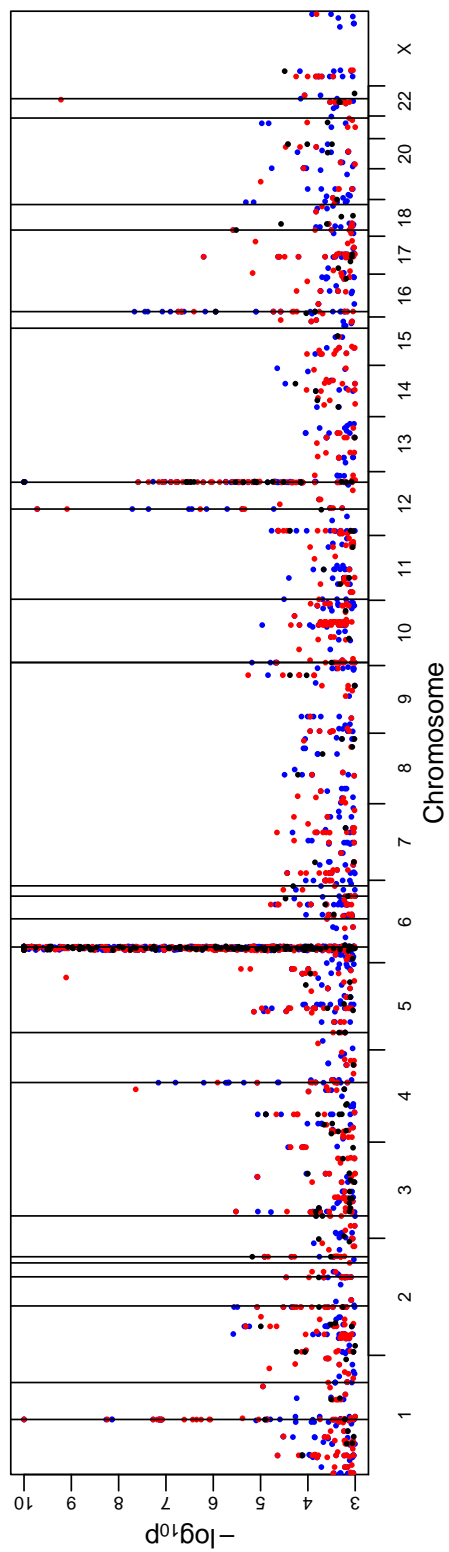

(a)

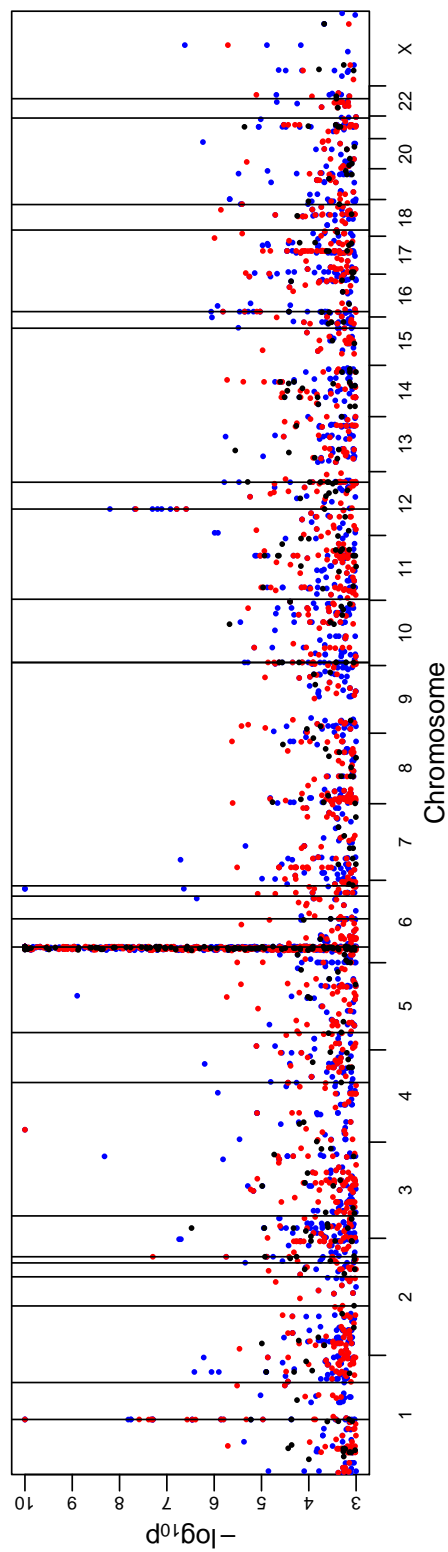

(b)

Supplementary Figure 1: (continued over-leaf)

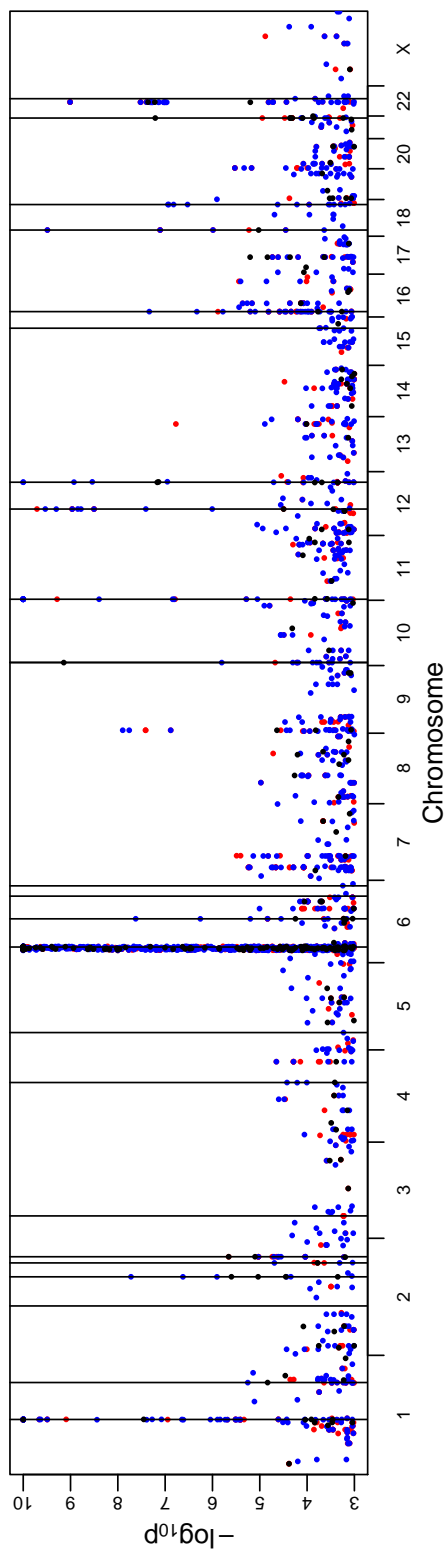

(c)

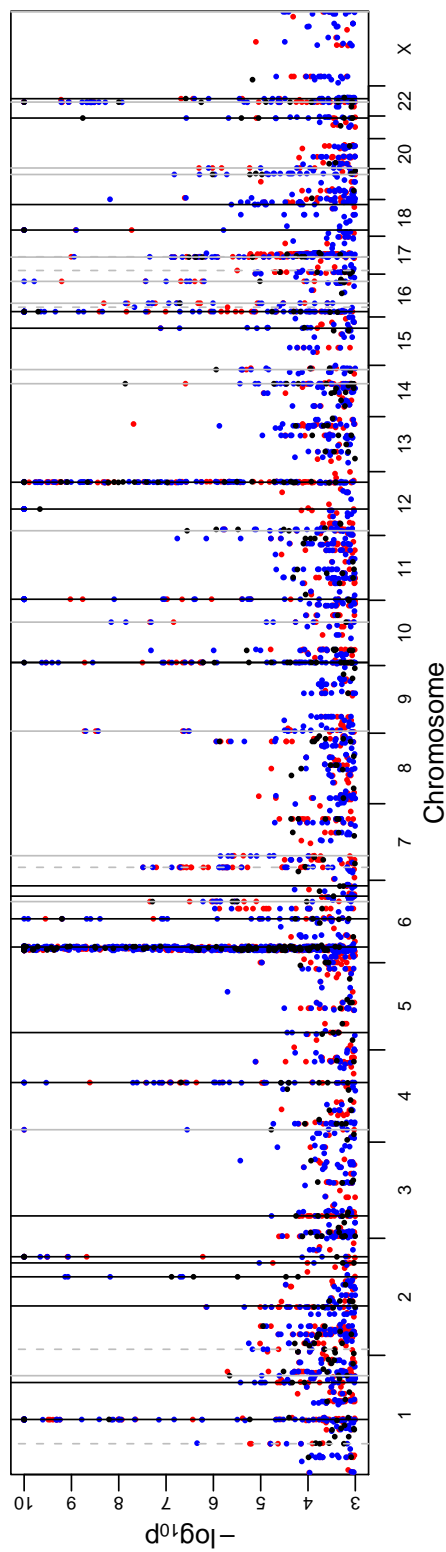

(d)

**Supplementary Figure 1:** Genome-wide plot of  $-\log_{10} p$ -values from stratified 1 df tests (a) in the WTCCC, (b) in the GoKinD/NIMH study, (c) in the T1DGC study, and (d) in the overall meta-analysis. Values of  $-\log_{10} p$  greater than 10 are plotted at 10 and values less than 3 are omitted. SNPs only present on the Illumina chip are shown in blue, those only present on the Affymetrix chip in red, and those present on both chips are shown in black. Points are plotted in the order blue, red, black in panels (a) and (b) and in the order red, blue, black in (c) and (d). Previously known disease susceptibility loci are marked by vertical black lines. In panel (d) new findings from the current analysis are marked by vertical grey lines (solid lines for convincingly replicated loci and dashed lines for nominally replicated results).

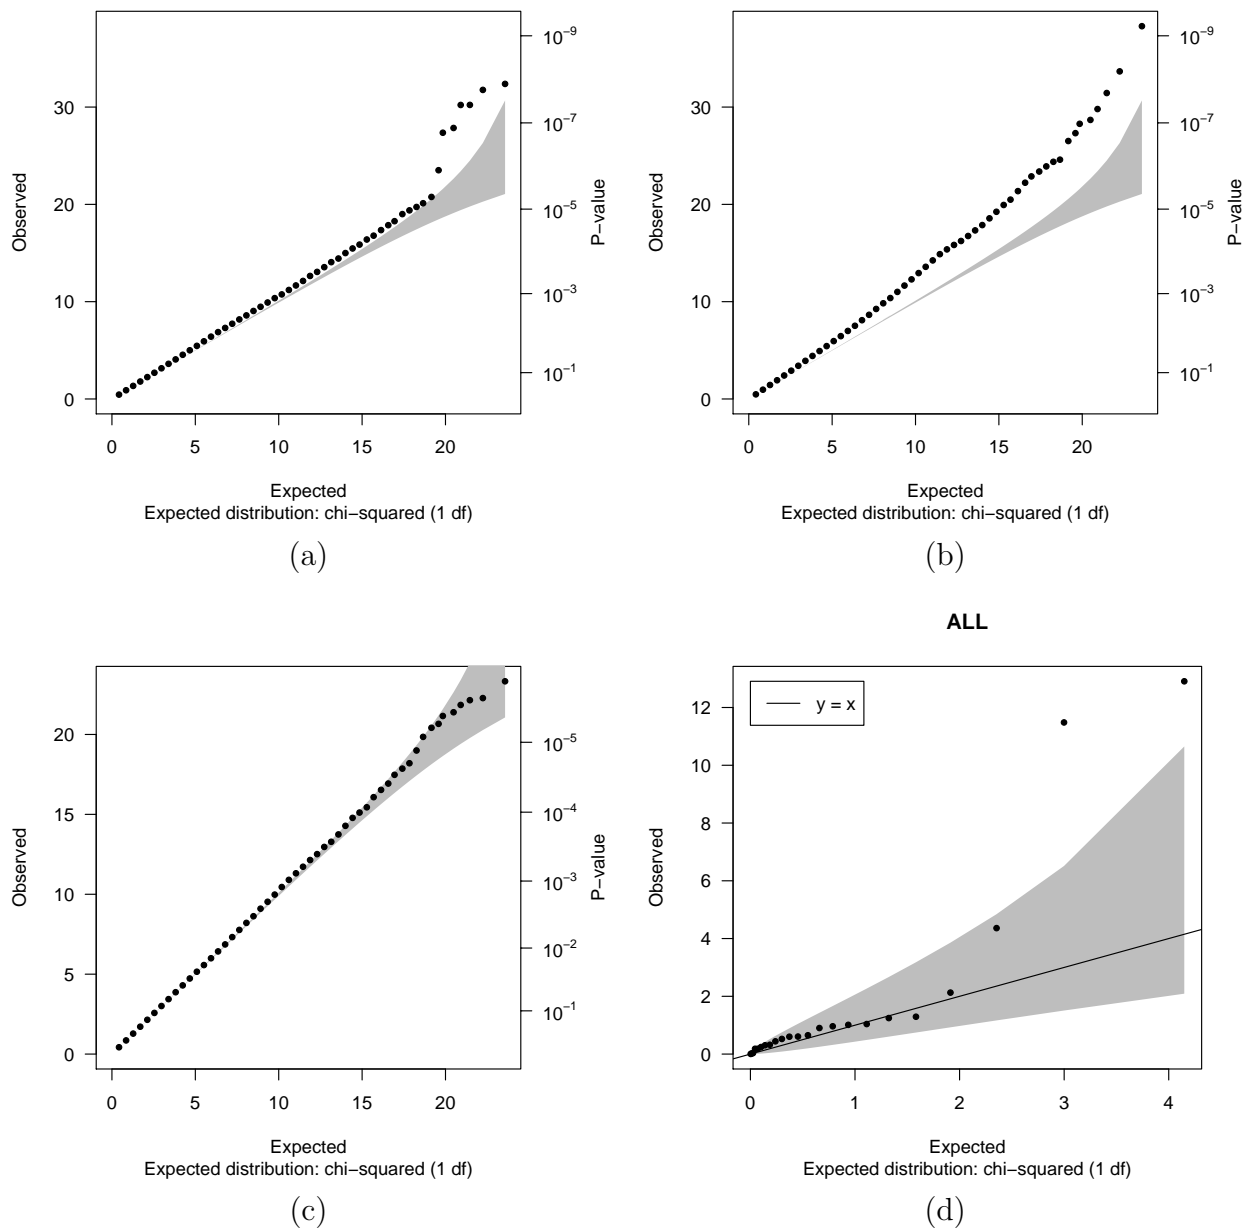

**Supplementary Figure 2:** Quantile-quantile plots for 1-df tests: (a) stratified tests in the T1DGC study alone, (b) stratified tests in the meta-analysis, (c) tests for interaction with MHC in the meta-analysis, and (d) tests for interaction with MHC for the most associated SNP in 44 regions associated with T1D in this or previous studies. The case-only approach has been used for interaction tests, which are stratified by geographical region (UK samples) or by PCA propensity score (US samples). In (a), (b) and (c), SNPs in regions surrounding putatively associated regions have been omitted and, for legibility, the lower 90% of the plot has been represented by only 50 points. In (d) the five nominally significant interactions were for rs1990760 (*IFIH1*, most significant), rs2476601 (*PTPN22*), rs16956936 (*DNAH2*), rs4900384 (gene desert), and rs3087243 (*CTLA4*, least significant). For rs4900384 interaction and main effect were in the same direction, indicating increased relative risk for this SNP with increased MHC risk, whilst the other four were consistent with reduced relative risk with increased MHC risk.

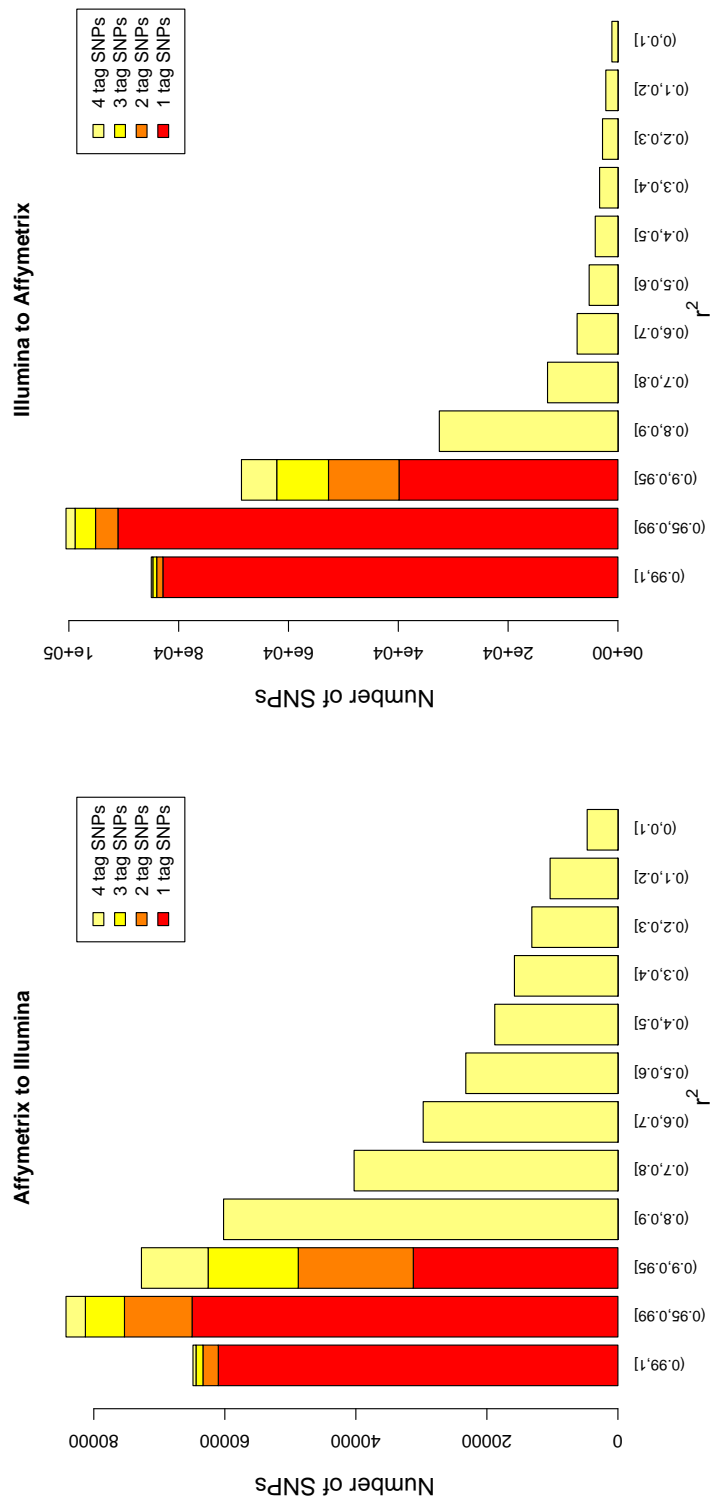

**Supplementary Figure 3:** Distribution of  $R^2$  achieved in imputation, by linear regression, of (a) Illumina SNPs from the Affymetrix platform, and (b) Affymetrix SNPs from the Illumina platform. A step-wise regression approach was used, stopping either when an  $R^2$  value of at least 0.9 was achieved or when four predictor SNPs had been used

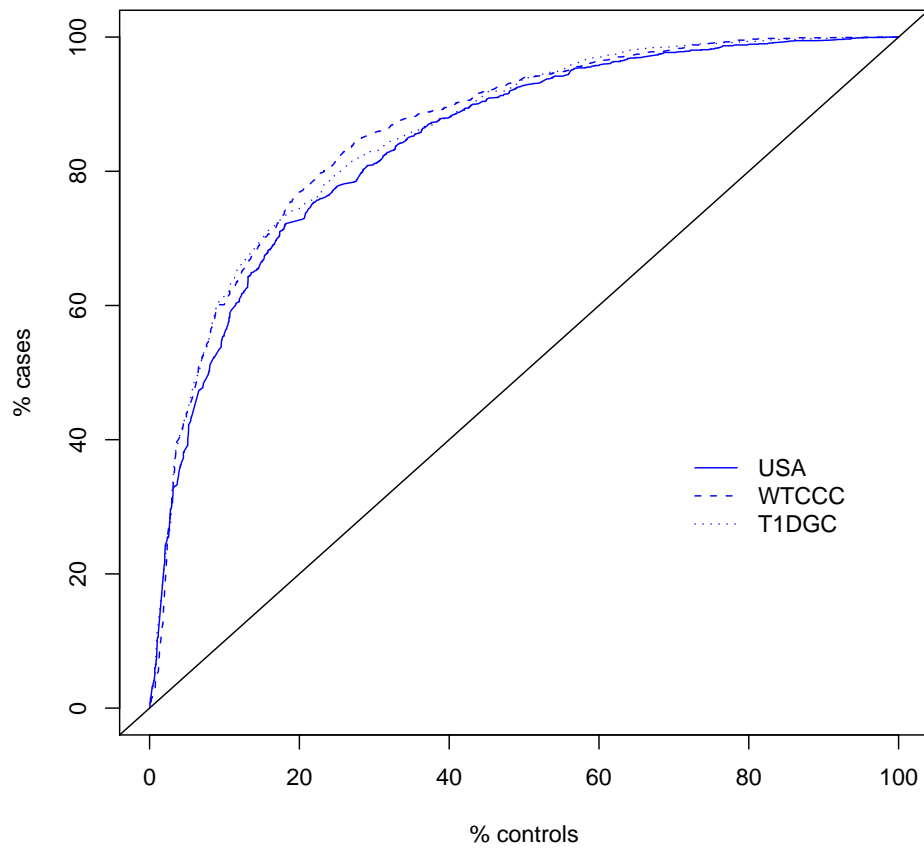

**Supplementary Figure 4:** Receiver operating curve for prediction of risk of type 1 diabetes from SNPs in the MHC region in the WTCCC and GoKinD/NIMH studies using the Affymetrix 500K chip, and in the T1DGC study using the Illumina 550K chip

| SNP        | Chromosome | Position | $p$ -values (1 df tests) |                       |                       | $p$ -values (2 df tests) |                       |            |
|------------|------------|----------|--------------------------|-----------------------|-----------------------|--------------------------|-----------------------|------------|
|            |            |          | Simple                   | Stratified            | GC-corrected          | Simple                   | Stratified            | Stratified |
| rs2269241  | 1          | 63.881   | $3.6 \times 10^{-7}$     | $5.9 \times 10^{-6}$  | $1.9 \times 10^{-5}$  | $2.4 \times 10^{-6}$     | $3.4 \times 10^{-5}$  |            |
| rs3024505  | 1          | 205.007  | $6.2 \times 10^{-7}$     | $2.2 \times 10^{-6}$  | $7.6 \times 10^{-6}$  | $2.1 \times 10^{-11}$    | $3.0 \times 10^{-10}$ |            |
| rs946487   | 1          | 213.482  | $4.9 \times 10^{-7}$     | $2.0 \times 10^{-6}$  | $7.0 \times 10^{-6}$  | $7.3 \times 10^{-7}$     | $5.1 \times 10^{-6}$  |            |
| rs1534422  | 2          | 12.558   | $7.9 \times 10^{-7}$     | $6.7 \times 10^{-6}$  | $2.1 \times 10^{-5}$  | $4.5 \times 10^{-6}$     | $3.6 \times 10^{-5}$  |            |
| rs4851256  | 2          | 100.141  | $8.6 \times 10^{-7}$     | $2.5 \times 10^{-5}$  | $6.8 \times 10^{-5}$  | $4.4 \times 10^{-6}$     | $1.0 \times 10^{-4}$  |            |
| rs10517086 | 4          | 25.695   | $4.9 \times 10^{-7}$     | $2.8 \times 10^{-7}$  | $1.2 \times 10^{-6}$  | $3.0 \times 10^{-6}$     | $1.7 \times 10^{-6}$  |            |
| rs9388489  | 6          | 126.740  | $2.0 \times 10^{-8}$     | $5.1 \times 10^{-8}$  | $2.6 \times 10^{-7}$  | $8.2 \times 10^{-13}$    | $1.0 \times 10^{-11}$ |            |
| rs7804356  | 7          | 26.858   | $7.4 \times 10^{-9}$     | $3.3 \times 10^{-8}$  | $1.7 \times 10^{-7}$  | $5.2 \times 10^{-8}$     | $2.2 \times 10^{-7}$  |            |
| rs4948088  | 7          | 50.995   | $4.1 \times 10^{-7}$     | $2.7 \times 10^{-6}$  | $9.2 \times 10^{-6}$  |                          |                       |            |
| rs2608053  | 8          | 129.145  | $8.0 \times 10^{-7}$     | $1.4 \times 10^{-6}$  | $4.9 \times 10^{-6}$  | $3.6 \times 10^{-6}$     | $7.2 \times 10^{-6}$  |            |
| rs7020673  | 9          | 4.282    | $3.5 \times 10^{-11}$    | $1.9 \times 10^{-9}$  | $1.4 \times 10^{-8}$  | $1.1 \times 10^{-10}$    | $5.0 \times 10^{-9}$  |            |
| rs2793108  | 10         | 31.419   | $1.1 \times 10^{-7}$     | $4.8 \times 10^{-8}$  | $2.5 \times 10^{-7}$  | $7.2 \times 10^{-7}$     | $3.3 \times 10^{-7}$  |            |
| rs10509540 | 10         | 90.013   | $6.3 \times 10^{-9}$     | $6.9 \times 10^{-9}$  | $4.3 \times 10^{-8}$  | $3.6 \times 10^{-8}$     | $3.8 \times 10^{-8}$  |            |
| rs4763879  | 12         | 9.801    | $2.8 \times 10^{-7}$     | $2.8 \times 10^{-7}$  | $1.2 \times 10^{-6}$  | $1.8 \times 10^{-6}$     | $1.6 \times 10^{-6}$  |            |
| rs1465788  | 14         | 68.333   | $2.8 \times 10^{-9}$     | $1.4 \times 10^{-8}$  | $8.0 \times 10^{-8}$  | $1.5 \times 10^{-13}$    | $3.1 \times 10^{-12}$ |            |
| rs4900384  | 14         | 97.569   | $8.9 \times 10^{-8}$     | $1.1 \times 10^{-6}$  | $4.2 \times 10^{-6}$  | $5.3 \times 10^{-7}$     | $6.3 \times 10^{-6}$  |            |
| rs12444268 | 16         | 20.250   | $3.9 \times 10^{-6}$     | $2.0 \times 10^{-6}$  | $7.0 \times 10^{-6}$  | $2.3 \times 10^{-5}$     | $1.2 \times 10^{-5}$  |            |
| rs4788084  | 16         | 28.447   | $1.1 \times 10^{-9}$     | $5.2 \times 10^{-8}$  | $2.6 \times 10^{-7}$  | $1.6 \times 10^{-9}$     | $8.7 \times 10^{-8}$  |            |
| rs7202877  | 16         | 73.805   | $1.7 \times 10^{-10}$    | $5.7 \times 10^{-11}$ | $5.9 \times 10^{-10}$ |                          |                       |            |
| rs16956936 | 17         | 7.574    | $6.5 \times 10^{-7}$     | $3.2 \times 10^{-6}$  | $1.1 \times 10^{-5}$  | $2.5 \times 10^{-6}$     | $1.2 \times 10^{-5}$  |            |
| rs2290400  | 17         | 35.320   | $9.0 \times 10^{-8}$     | $1.3 \times 10^{-7}$  | $6.1 \times 10^{-7}$  | $6.1 \times 10^{-7}$     | $8.9 \times 10^{-7}$  |            |
| rs7221109  | 17         | 36.024   | $6.0 \times 10^{-10}$    | $9.9 \times 10^{-10}$ | $7.6 \times 10^{-9}$  | $4.0 \times 10^{-9}$     | $7.3 \times 10^{-9}$  |            |
| rs12982646 | 19         | 0.451    | $8.0 \times 10^{-9}$     | $6.5 \times 10^{-9}$  | $4.1 \times 10^{-8}$  | $3.5 \times 10^{-8}$     | $2.2 \times 10^{-8}$  |            |
| rs425105   | 19         | 51.900   | $3.4 \times 10^{-8}$     | $1.5 \times 10^{-7}$  | $6.8 \times 10^{-7}$  | $2.4 \times 10^{-7}$     | $9.8 \times 10^{-7}$  |            |
| rs2281808  | 20         | 1.559    | $1.9 \times 10^{-7}$     | $5.0 \times 10^{-7}$  | $2.0 \times 10^{-6}$  | $1.2 \times 10^{-6}$     | $3.2 \times 10^{-6}$  |            |
| rs5753037  | 22         | 28.912   | $5.4 \times 10^{-14}$    | $1.8 \times 10^{-14}$ | $4.4 \times 10^{-13}$ | $1.1 \times 10^{-13}$    | $4.0 \times 10^{-14}$ |            |
| rs2664170  | X          | 153.599  | $1.3 \times 10^{-6}$     | $3.0 \times 10^{-5}$  | $8.0 \times 10^{-5}$  | $5.5 \times 10^{-6}$     | $1.1 \times 10^{-4}$  |            |

**Supplementary Table 1:** Simple and stratified association test results from the meta-analysis combining results of three GWA studies. Stratified test  $p$ -values are also shown after genomic control correction with  $\lambda = 1.119$ . The 2 df tests were only calculated if the minor allele frequency exceeded 10%

| SNP        | Chromosome | Position | <i>p</i> -value (1 df test) |                      |                       |                       |                       |
|------------|------------|----------|-----------------------------|----------------------|-----------------------|-----------------------|-----------------------|
|            |            |          | WTCCC                       | GoKinD/NIMH          | T1DGC                 | WTCCC+T1DGC           | All studies           |
| rs3024505  | 1          | 205.007  | $3.5 \times 10^{-3}$        | $6.1 \times 10^{-1}$ | $3.5 \times 10^{-5}$  | $4.2 \times 10^{-7}$  | $2.2 \times 10^{-6}$  |
| rs10517086 | 4          | 25.695   | $3.4 \times 10^{-4}$        | $1.8 \times 10^{-2}$ | $2.7 \times 10^{-3}$  | $5.0 \times 10^{-6}$  | $2.8 \times 10^{-7}$  |
| rs9388489  | 6          | 126.740  | $1.3 \times 10^{-2}$        | $3.6 \times 10^{-3}$ | $8.8 \times 10^{-5}$  | $3.7 \times 10^{-6}$  | $5.1 \times 10^{-8}$  |
| rs4948088  | 7          | 50.995   | $3.1 \times 10^{-2}$        | $5.8 \times 10^{-1}$ | $3.9 \times 10^{-6}$  | $7.8 \times 10^{-7}$  | $2.7 \times 10^{-6}$  |
| rs7020673  | 9          | 4.282    | $1.8 \times 10^{-4}$        | $6.2 \times 10^{-3}$ | $1.1 \times 10^{-4}$  | $8.8 \times 10^{-8}$  | $1.9 \times 10^{-9}$  |
| rs10509540 | 10         | 90.013   | $1.4 \times 10^{-3}$        | $4.9 \times 10^{-5}$ | $3.3 \times 10^{-3}$  | $1.4 \times 10^{-5}$  | $6.9 \times 10^{-9}$  |
| rs4763879  | 12         | 9.801    | $8.0 \times 10^{-4}$        | $7.0 \times 10^{-4}$ | $1.1 \times 10^{-2}$  | $5.2 \times 10^{-5}$  | $2.8 \times 10^{-7}$  |
| rs1465788  | 14         | 68.333   | $5.4 \times 10^{-5}$        | $1.8 \times 10^{-2}$ | $6.9 \times 10^{-4}$  | $2.5 \times 10^{-7}$  | $1.4 \times 10^{-8}$  |
| rs4900384  | 14         | 97.569   | $8.1 \times 10^{-2}$        | $1.3 \times 10^{-3}$ | $5.5 \times 10^{-4}$  | $1.4 \times 10^{-4}$  | $1.1 \times 10^{-6}$  |
| rs4788084  | 16         | 28.447   | $7.5 \times 10^{-2}$        | $4.9 \times 10^{-3}$ | $6.8 \times 10^{-6}$  | $2.9 \times 10^{-6}$  | $5.2 \times 10^{-8}$  |
| rs7202877  | 16         | 73.805   | $2.1 \times 10^{-3}$        | $2.4 \times 10^{-4}$ | $3.9 \times 10^{-6}$  | $3.1 \times 10^{-8}$  | $5.7 \times 10^{-11}$ |
| rs2290400  | 17         | 35.320   | $1.7 \times 10^{-2}$        | $1.1 \times 10^{-2}$ | $6.5 \times 10^{-5}$  | $3.8 \times 10^{-6}$  | $1.3 \times 10^{-7}$  |
| rs425105   | 19         | 51.900   | $1.2 \times 10^{-2}$        | $1.5 \times 10^{-3}$ | $4.5 \times 10^{-4}$  | $1.6 \times 10^{-5}$  | $1.5 \times 10^{-7}$  |
| rs2281808  | 20         | 1.559    | $4.6 \times 10^{-2}$        | $1.5 \times 10^{-1}$ | $3.0 \times 10^{-6}$  | $8.9 \times 10^{-7}$  | $5.0 \times 10^{-7}$  |
| rs5753037  | 22         | 28.912   | $1.5 \times 10^{-3}$        | $3.9 \times 10^{-4}$ | $9.8 \times 10^{-10}$ | $1.1 \times 10^{-11}$ | $1.8 \times 10^{-14}$ |
| rs2664170  | X          | 153.599  | $1.0 \times 10^{-1}$        | $3.3 \times 10^{-2}$ | $1.2 \times 10^{-3}$  | $2.9 \times 10^{-4}$  | $3.0 \times 10^{-5}$  |
| rs2269241  | 1          | 63.881   | $7.6 \times 10^{-4}$        | $2.2 \times 10^{-1}$ | $2.5 \times 10^{-3}$  | $7.9 \times 10^{-6}$  | $5.9 \times 10^{-6}$  |
| rs1534422  | 2          | 12.558   | $2.2 \times 10^{-2}$        | $2.4 \times 10^{-1}$ | $8.8 \times 10^{-5}$  | $7.6 \times 10^{-6}$  | $6.7 \times 10^{-6}$  |
| rs7804356  | 7          | 26.858   | $1.6 \times 10^{-1}$        | $2.4 \times 10^{-5}$ | $5.1 \times 10^{-5}$  | $4.8 \times 10^{-5}$  | $3.3 \times 10^{-8}$  |
| rs12444268 | 16         | 20.250   | $3.0 \times 10^{-2}$        | $1.9 \times 10^{-2}$ | $2.2 \times 10^{-4}$  | $3.5 \times 10^{-5}$  | $2.0 \times 10^{-6}$  |
| rs16956936 | 17         | 7.574    | $3.4 \times 10^{-4}$        | $4.5 \times 10^{-3}$ | $7.8 \times 10^{-2}$  | $1.8 \times 10^{-4}$  | $3.2 \times 10^{-6}$  |
| rs7221109  | 17         | 36.024   | $6.3 \times 10^{-7}$        | $8.7 \times 10^{-2}$ | $2.2 \times 10^{-4}$  | $1.9 \times 10^{-9}$  | $9.9 \times 10^{-10}$ |
| rs946487   | 1          | 213.482  | $4.1 \times 10^{-2}$        | $3.3 \times 10^{-5}$ | $1.6 \times 10^{-2}$  | $1.6 \times 10^{-3}$  | $2.0 \times 10^{-6}$  |
| rs2608053  | 8          | 129.145  | $4.5 \times 10^{-2}$        | $3.4 \times 10^{-3}$ | $7.5 \times 10^{-4}$  | $9.9 \times 10^{-5}$  | $1.4 \times 10^{-6}$  |
| rs2793108  | 10         | 31.419   | $8.9 \times 10^{-3}$        | $4.2 \times 10^{-3}$ | $1.1 \times 10^{-4}$  | $3.0 \times 10^{-6}$  | $4.8 \times 10^{-8}$  |
| rs4851256  | 2          | 100.141  | $5.3 \times 10^{-4}$        |                      | $8.4 \times 10^{-3}$  | $2.5 \times 10^{-5}$  | $2.5 \times 10^{-5}$  |
| rs12982646 | 19         | 0.451    | $7.3 \times 10^{-3}$        | $5.9 \times 10^{-2}$ | $1.2 \times 10^{-6}$  | $3.8 \times 10^{-8}$  | $6.5 \times 10^{-9}$  |

**Supplementary Table 2:** SNPs in the follow-up study: results of stratified 1 df (Mantel extension) tests for each GWAS individually and in combination. Horizontal lines divide the SNPs into groups as strongly replicated, weakly replicated, not replicated, and failure



| SNP       | Coefficient | SNP       | Coefficient |
|-----------|-------------|-----------|-------------|
| rs805294  | 0.021       | rs3131631 | 0.043       |
| rs2187668 | 0.660       | rs377763  | 0.003       |
| rs9275313 | 0.346       | rs3135377 | 0.254       |
| rs9275388 | 0.300       | rs9273363 | 1.104       |
| rs9275425 | 0.129       | rs9275418 | 0.373       |
| rs9275614 | 0.276       | rs3916765 | 0.035       |

(a) (b)

**Supplementary Table 3:** Coefficients for MHC SNPs used to predict disease risk: (a) for Illumina 550K platform, (b) for Affymetrix 500K platform

## Supplementary methods

### Sample exclusions

The sample and SNP exclusion criteria we used were identical to those reported by the WTCCC (reference [7]), but we excluded a further 80 samples both because of a stricter cutoff for non-European ancestry and because several samples overlapped with the T1DGC, since they were drawn from the same pools. Of these, 48 subjects were excluded due to evidence of non-European ancestry, 16 were duplicated records (or unrecorded MZ twins), and 16 were closely related to other subjects. The composition of the GoKinD/NIMH case and control groups has been described elsewhere (reference [10]) and exclusions reported there were also applied in our analysis. These resulted in stringent cut-offs resulted in 124 exclusions, split 118:4:2 between the three exclusion categories described above. In the new T1DGC study, there were 82 exclusions, split 70:1:11 between non-European ancestry, duplicates, and close relatives.

### SNP exclusions

In all studies, SNPs were excluded if the minor allele frequency (MAF) fell below 1% in cases or controls or if the 1 df chi-squared test for deviation from Hardy-Weinberg equilibrium exceeded 25 in controls ( $p < 5.7 \times 10^{-7}$ ). Note that previously published results for the GoKinD/NIMH study reported results only for SNPs with MAF greater than 5%. For the WTCCC and T1DGC studies, individual genotype calls were only accepted if posterior probability of the best call exceeded a threshold (0.9 in the former case, 0.95 in the latter) and the SNP was excluded if the call rate fell below 95%. For the GoKinD/NIMH study, the best call was recorded in each case, but SNPs were discarded if a metric measuring separation of the genotype signal clouds indicated insufficient separation.

### Follow-up studies

The most significantly associated SNP in each of the 26 regions with  $p < 10^{-6}$  (unstratified Cochran–Armitage test), together with the most significantly associated SNP on the X chromosome were chosen for follow-up. For two SNPs, rs4851256 (at 100.14mb on chromosome 2) and rs12982646 (0.45mb on chromosome 19), reliable Taqman assays were not available. The (stratified) 1 df  $p$ -values for these two SNPs in the meta-analysis were, respectively,  $2.5 \times 10^{-5}$  and  $6.5 \times 10^{-9}$ . Three further SNPs, rs94648, rs2608053, and rs2793108 were followed up, but failed to provide any evidence of association ( $p > 0.1$ ).

### Statistical methods

In the current context, Mantel's extension to the Cochran–Armitage test (reference [24]) computes, in cases, an observed minus expected allele frequency score within each stratum together with its variance without assuming Hardy Weinberg equilibrium. The scores and their variances are then added over strata and the squared total score divided by the total variance to provide a chi-squared test statistic with 1 df. The corresponding 2 df test compare genotype frequencies between cases and controls and pool information over studies and strata in a similar manner; two observed-minus-expected scores must

be computed for each stratum together with the corresponding  $2 \times 2$  variance-covariance matrix; scores and variances are then summed over strata as in the 1 df test to yield an overall “score” vector,  $U$  of length 2, together with its  $2 \times 2$  covariance matrix,  $V$ . The 2 df test is then obtained by computing  $U^T V^{-1} U$ . Since, for loci on the X chromosome, males would be expected to show similar risk gradients to those between homozygous females, the method proposed by Clayton (reference [25]) scores male contributions to the test score for the 1 df test in the same way as homozygous females, with an appropriate adjustment to the variance estimate. The second degree of freedom in the 2 df test is derived entirely from data from females.

Imputation between the two platforms was carried out by simple linear regression, a method proposed some years ago. We chose this in preference to more recently proposed methods because these are based on the rather small sample of HapMap subjects, while the regression approach could make use of the 1,422 controls genotyped on both platforms. These were used to derive linear regression equations to predict those SNPs only genotyped on the Affymetrix platform using SNPs available on the Illumina platform, and vice-versa. For this purpose, all genotypes were coded numerically, as 0, 1 or 2, and the regression equations were used to obtain predictions for the missing genotypes in the remaining studies. The resulting predictions are real numbers so that observed numbers of genotypes in cases are no longer integers but, that apart, analysis proceeds in exactly the same way as for truly observed genotypes. Imputed SNPs also yield observed-minus-expected scores and associated variances and evidence was combined over studies in the same way as it is combined over strata within studies. Note that a natural consequence of poor prediction is shrinkage of the observed-minus-expected score so that the contribution of poorly imputed genotypes in the meta-analysis is naturally (and correctly) attenuated.

Follow-up case-control data were analyzed in the same way as the GWAS data, with Danish and UK studies treated as separate strata. The family study was analyzed by the transmission/disequilibrium test (TDT). The families were, for the most part, affected sib-pairs together with their parents so that each family contributed two caseparent trios. Since linkage (as reflected by distortion of the 0.25:0.5:0.25 IBD sharing probabilities between siblings) was imperceptible in these regions we were able to treat the two trios provided by each family as independent. For analysis of the family data for the SNP on the X chromosome, the TDT was modified following the same principles which prompted the modification to the case-control test; each transmission from a heterozygous mother to a male offspring was given twice the weight of a transmission to a female offspring. Since the TDT can also be formulated in terms of an observed-minus-expected allele count score in cases and its variance, pooling evidence from the family data and from case-control data follows identical principles to pooling of evidence across strata in case-control studies, *i.e.* scores and their variances are summed over studies before calculation of the final chi-squared test statistic.

## Supplementary Note

### Membership list for the Type 1 Diabetes Genetics Consortium

**Asia-Pacific Network:** Tracey Baskerville (Mater Children's Hospital, Australia); Nines Bautista (Institute for Study on Diabetes Foundation, Philippines); Eesh Bhatia (Sanjay Gandhi Postgraduate Institute, India); Vijayalakshmi Bhatia (Sanjay Gandhi Postgraduate Institute, India); Kamaruzaman Bin Hasan (National University of Malaysia Hospital, Malaysia); Francois Bonnici (University of Cape Town, South Africa); Thomas Brodnicki (Walter & Eliza Hall Institute of Medical Research, Australia); Fergus Cameron (Royal Children's Hospital, Australia); Katharee Chaichanwatanakul (Mahidol University, Thailand); Pik To Cheung (Queen Mary Hospital, Hong Kong); Peter Colman<sup>2,5,11,15</sup> (Walter & Eliza Hall Institute of Medical Research, Australia); Andrew Cotterill (Mater Children's Hospital, Australia); Jenny Couper (Women's and Children's Hospital, Australia); Ric Cutfield (North Shore Hospital, New Zealand); Tim Davis (Fremantle Hospital, Australia); Paul Dixon (Diabetes Lifestyle Centre, New Zealand); Kim Donaghue (Children's Hospital at Westmead, Australia); Katrina Dowling<sup>4</sup> (Australian Red Cross Blood Service, Australia); Paul Drury (Auckland Diabetes Centre, New Zealand); Sarah Dye (Western Australia Institute for Medical Research, Australia); Shane Gellert<sup>2</sup> (The Royal Melbourne Hospital, Australia); Rohana Abdul Ghani (National University of Malaysia Hospital, Malaysia); Ristan Greer (University of Queensland, Australia); Xueyao Han (Peking University People's Hospital, China); Len Harrison (Walter & Eliza Hall Institute of Medical Research, Australia); Nick Homatopoulos<sup>4</sup> (Australian Red Cross Blood Service, Australia); Linong Ji (Peking University People's Hospital, China); Tim Jones (Princess Margaret Hospital for Children, Australia); Loke Kah Yin (Children's Medical Institute, Singapore); Nor Azmi Kamaruddin (National University of Malaysia Hospital, Malaysia); Uma Kanga (All India Institute of Medical Sciences, India); Alok Kanungo (Cuttack Diabetes Research Foundation, India); Gurvinder Kaur (All India Institute of Medical Sciences, India); Betty Kek (Children's Medical Institute, Singapore); Simon Knowles<sup>4</sup> (Australian Red Cross Blood Service, Australia); Jeremy Krebs (The Diabetes Centre, New Zealand); Neeraj Kumar (All India Institute of Medical Sciences, India); Yann-Jinn Lee<sup>7</sup> (Mackay Memorial Hospital, Taiwan); Xiaoying Li (Shanghai Jiao-Tong University, China); Supawadee Likitmaskul (Mahidol University, Thailand); Margaret Lloyd (Children's Hospital at Westmead, Australia); Amanda Loth<sup>5,10</sup> (Walter & Eliza Hall Institute of Medical Research, Australia); Anthony Louey<sup>3,4</sup> (Australian Red Cross Blood Service, Australia); Narinder Mehra<sup>8</sup> (All India Institute of Medical Sciences, India); Tony Merriman (University of Otago, New Zealand); Liu Min (Beijing Children's Hospital, China); Grant Morahan<sup>1,9,12,14,15</sup> (Western Australia Institute for Medical Research, Australia); Robert Moses (Illawarra Diabetes Services, Australia); Grant Mraz<sup>4</sup> (Australian Red Cross Blood Service, Australia); Rinki Murphy (Auckland Diabetes Centre, New Zealand); Ian Nicholson<sup>4</sup> (Australian Red Cross Blood Service, Australia); Araceli Panelo (Institute for Studies on Diabetes Foundation, Philippines); Perlita Poh<sup>2</sup> (Royal Melbourne Hospital, Australia); Gareth Price (Mater Medical Research Institute, Australia); Nirubasini Ratnam (Princess Margaret Hospital for Children, Australia); Carani Sanjeevi<sup>6</sup> (Karolinska Hospital, Sweden); Saikiran Sedimbi (Karolinska Hospital, Sweden); Shuixian Shen (Fudan University, China); Goh Siok Ying (The Children's Medical Institute, Singapore); Brian Tait<sup>3,4,5,6</sup> (Australian Red Cross Blood Service, Australia); Nikhil Tandon (All India Institute of Medical Sciences, India); Allison Thomas (Walter & Eliza Hall Institute of Medical Research, Australia); Mike Varney<sup>3,4</sup> (Australian Red Cross Blood Service, Australia); Praewvarin Weerakulwattana (Mahidol University, Thailand); Jinny Willis (Christchurch Hospital, New Zealand)

**European Network:** Lotte Albrecht<sup>5,10</sup> (Steno Diabetes Center, Denmark); Francisco Ampudia-Blasco (Clinic University Hospital Valencia, Spain); Jesus Argente (Hospital Infantil Universitario Nino Jesus, Spain); Gulja Babadjanova (Moscow State Medical University, Russia); Klaus Badenhoop<sup>14</sup> (Universitätsklinikum Frankfurt/Main, Germany); Tadej Battelino (University Children's Hospital, Slovenia); Georg Beilhack<sup>14</sup> (University of Ulm, Germany); Regine Bergholdt (Steno Diabetes Center, Denmark); Polly Bingley<sup>2,5</sup> (University of Bristol, United Kingdom); Bernhard Boehm<sup>4,5,14</sup> (Ulm University, Germany); Jo Bolidson<sup>2</sup> (University of Bristol, United Kingdom); Caroline Brorsson<sup>14</sup> (Steno Diabetes Center, Denmark); Joyce Carlson<sup>3,5</sup> (University Hospital MAS, Sweden); Luis Castano (Hospital de Cruces, Spain); Kyla Chandler<sup>2</sup> (University of Bristol, United Kingdom); Ondrej Cinek (Motol University Hospital, Czech Republic); Elisa Cipponeri (University Campus Bio-Medico, Italy); Raquel Corripio (Consorti Sanitari Parc Tauli, Spain); Beatriz Garcia Cuartero (Hospital Severo Ochoa, Spain); Alberto de Leiva (Hospital Sant Pau, Spain); Ana Fagulha (University Hospital, Portugal); Merce Fernandez Balcells (Hospital Trueta, Spain); Cristian Guja (Institute of Diabetes, Nutrition & Metabolic Diseases, Romania); Pilar Gutierrez (Hospital Universitario de Getafe, Madrid); Erifili Hatziagelaki (University of Athens, Greece); Simon Heath<sup>7</sup> (Centre National de Genotypage, France); Wolfgang Helmberg<sup>5,7</sup> (Medical University Graz, Austria); Marta Hernandez (Hospital Universitario de Canarias, Spain); Iris Holzheu<sup>4</sup> (Ulm University, Germany); Nora Hosszufalusi (Semmelweis University, Hungary); Constantin Ionescu-Tirgoviste (Institute of Diabetes, Romania); Jesper Johannesen (Steno Diabetes Center, Denmark); Cecile Julier<sup>1,9,12,14</sup> (Centre National de Genotypage, France); Heinrich Kahles<sup>14</sup> (Klinikum der J.W. Goethe-Universität, Germany); Michael Knip (University of Helsinki, Finland); Ingrid Kockum<sup>7,14</sup> (Karolinska Hospital, Sweden); Eija Kojo (University of Helsinki, Finland); Kalinka Koprivarova (University Children's Hospital, Bulgaria); Olga Kordonouri (Children's Hospital auf der Bult, Germany); Adam Kretowski (Medical University of Bialystok, Poland); Dora Krikovszky (Semmelweis University, Hungary); Angelika Kurkhaus<sup>4</sup> (Ulm University, Germany); Nebojsa Lalic (Institute for Endocrinology, Diabetes & Metabolic Diseases, Serbia-Montenegro); Eva Lavant<sup>3</sup> (University Hospital MAS, Sweden); Anna Long<sup>2</sup> (University of Bristol, United Kingdom); Johnny Ludvigsson (University Hospital, Sweden); Laszlo Madacsy (Semmelweis University, Hungary); Mara Marga (P. Stradins University Hospital, Latvia); Didac Mauricio<sup>6</sup> (Hospital Universitari Arnau de Vilanova, Spain); Gertrud Mazurkiewicz<sup>4</sup> (Ulm University, Germany); Jorn Nerup<sup>1,15</sup> (Steno Diabetes Center, Denmark); Francisco Javier Novoa Mogollon (Hospital Universitario Insular, Spain); Mette Terp Petersen (Steno Diabetes Center, Denmark); Moshe Phillip (Schneider Children's Medical Center of Israel, Israel); Valdis Pirags (P. Stradins University Hospital, Latvia); Flemming Pociot<sup>1,11,12,14,15</sup> (Steno Diabetes Center, Denmark); Paolo Pozzilli (University Campus Bio-Medico, Italy); Rebecca Rappner<sup>3</sup> (University Hospital MAS, Sweden); Bart Roep (Leiden University Medical Center, Netherlands); Saba Rokni<sup>2</sup> (Southmead Hospital, United Kingdom); Silke Rosinger<sup>4</sup> (Ulm University, Germany); Oscar Rubio-Cabezas (Hospital Infantil Universitario Nino Jesus, Spain); Christa Ruckgaber<sup>4</sup> (Ulm University, Germany); Ilhan Satman (Istanbul University, Turkey); Edith Schober (University Children's Hospital, Austria); Jochen Seufert (Medizinische Poliklinik der Universität, Germany); Rosi Sing<sup>4</sup> (Ulm University, Germany); Jan Skrha (Faculty of Medicine<sup>1</sup>, Czech Republic); Eugene Sobngwi (Central National Obesity Centre and Hospital of Diabetes Endocrine, Cameroon); Michelle Somerville<sup>2</sup> (University of Bristol, United Kingdom); Giatgen Spinas<sup>8</sup> (University Hospital, Switzerland); Vallo Tilmann (Tartu University Children's Hospital, Estonia); Dag Undlien<sup>6</sup> (University of Oslo, Norway); Vaidotas Urbanavicius (Vilnius University Hospital, Lithuania); Bart Van der Auwera<sup>8</sup> (Vrije Universiteit Brussel, Belgium); Federico Vasquez San Miguel (Hospital de Cruces, Spain);

Andriani Vazeo-Gerasimidi (Diabetes Center P&A Kyriakou Children's Hospital, Greece); Dzilda Velickiene (Kaunas Medical University, Lithuania); Ana Wagner<sup>5,10</sup> (Steno Diabetes Center, Denmark); Alistair Williams<sup>2</sup> (University of Bristol, United Kingdom); Miroslav Wurzbürger (University Clinical Center "Zvezdara", Serbia-Montenegro); Anette Ziegler (Diabetes Research Institute, Germany)

**North American Network:** Matthew Agleham<sup>3</sup> (Roche Molecular Systems, United States); Alan Aldrich<sup>5,10</sup> (Benaroya Research Institute, United States); Ramin Alemzadeh (Medical College of Wisconsin, United States); Theresa Aly (Barbara Davis Center for Childhood Diabetes, United States); Shaily Arora<sup>3</sup> (Children's Hospital Oakland Research Institute, United States); Audrey Austin (Children's National Medical Center, United States); Dorothy Becker (Rangos Research Center, United States); Christophe Benoist (Joslin Diabetes Center, United States); Noureddine Berka<sup>6</sup> (Calgary Laboratory Services, Canada); Suruchi Bhatia (Oakland Children's Hospital Research Center, United States); Persia Bonella<sup>3</sup> (Roche Molecular Systems, United States); Nunzio Bottini<sup>14</sup> (University of Southern California, United States); Sean Boyle<sup>3</sup> (Roche Molecular Systems, United States); Barry Brady (Arkansas Children's Hospital, United States); Wendy Brickman (Children's Memorial Hospital, United States); Richard Christensen (Humphreys Diabetes Center, United States); Patrick Concannon<sup>1,9,12,14</sup> (University of Virginia, United States); Robert Couch (University of Alberta, Canada); Debra Counts (University of Maryland, United States); Jill Crandall (Albert Einstein College of Medicine, United States); Mark Daniels (Children's Hospital of Orange County, United States); Larry Dolan (Cincinnati Children's Hospital Medical Center, United States); David Donaldson (Utah Diabetes Center, United States); Alessandro Doria<sup>6</sup> (Joslin Diabetes Center, United States); George Eisenbarth<sup>2,5,13,14</sup> (Barbara Davis Center for Childhood Diabetes, United States); Rita El-Hajj (Main Line Health Heart Center, United States); Henry Erlich<sup>1,3,5,13,14</sup> (Roche Molecular Systems, United States); Pamela Fain (Barbara Davis Center for Childhood Diabetes, United States); Anna Lisa Fear<sup>3</sup> (Children's Hospital Oakland Research Institute, United States); Robert Ferry (The University of Texas Health Science Center at San Antonio, United States); Rosanna Fiallo-Scharer (Barbara Davis Center for Childhood Diabetes, United States); Soumitra Ghosh<sup>6</sup> (Medical College of Wisconsin, United States); Steven Gitelman (University of California at San Francisco, United States); Michelle Godwin<sup>4</sup> (Fred Hutchinson Cancer Research Center, United States); Robin Goland (Naomi Berrie Diabetes Center, United States); Nathan Goodman<sup>7</sup> (Institute for Systems Biology, United States); Greg Goodwin (Joslin Diabetes Center, United States); Jenna Gravely<sup>4</sup> (Fred Hutchinson Cancer Research Center, United States); Carla Greenbaum<sup>8,11,15</sup> (Benaroya Research Institute, United States); Chelsea Gudgeon<sup>4</sup> (Fred Hutchinson Cancer Research Center, United States); Fred Gunville (Billings Clinic, United States); William Hagopian<sup>11</sup> (University of Washington, United States); Hakon Hakonarson (Children's Hospital of Philadelphia, United States); John Hansen<sup>4,5</sup> (Fred Hutchinson Cancer Research Center, United States); Kimberly Harrington<sup>4</sup> (Fred Hutchinson Cancer Research Center, United States); Jeanne Hassing (Sacred Heart, United States); Wendy Hilliker<sup>4</sup> (Fred Hutchinson Cancer Research Center, United States); Robert Hoffman (Ohio State University, United States); Erin Hulbert (Institute for Systems Biology, United States); Roberto Izquierdo (SUNY Upstate Medical University, United States); Nicholas Jospe (University of Rochester, United States); Kevin Kaiserman (Children's Hospital Los Angeles, United States); Francine Kaufman (Children's Hospital Los Angeles, United States); Samuel Kim<sup>3</sup> (Roche Molecular Systems, United States); Erin Kloos<sup>4</sup> (Fred Hutchinson Cancer Research Center, United States); Roman Kosoy (Benaroya Research Institute, United States); James Lane (University of Nebraska, United States); Julie Lane<sup>3</sup> (Children's Hospital Oakland Research Institute, United States); Jean Lawrence (Kaiser Permanente, United States); Claresa Levetan (Main

Line Health Heart Center, United States); Phil Levin (MODEL Clinical Research, United States); Rebecca Lipton (University of Chicago, United States); John Lonsdale (Human Biological Data Interchange, United States); Victoria Magnuson (Children's Hospital of Wisconsin, United States); Jennifer Marks (University of Miami, United States); Beth Mayer-Davis (University of South Carolina, United States); Robert McEvoy (Children's Hospital of Minnesota, United States); Richard McIndoe<sup>7</sup> (Medical College of Georgia, United States); Lesley Merkle<sup>4</sup> (Fred Hutchinson Cancer Research Center, United States); Daniel Metzger (BC Children's Hospital, Canada); Dongmei Miao<sup>2</sup> (Barbara Davis Center for Childhood Diabetes, United States); Eric Mickelson<sup>4</sup> (Fred Hutchinson Cancer Research Center, United States); Priscilla Moonsamy<sup>3</sup> (Roche Molecular Systems, United States); Wayne Moore (Children's Mercy Hospital, United States); Antoinette Moran (University of Minnesota, United States); Janelle Noble<sup>3,5,13,14</sup> (Children's Hospital Oakland Research Institute, United States); Gary Olsem<sup>4</sup> (Fred Hutchinson Cancer Research Center, United States); Suna Onengut-Gumuscu<sup>14</sup> (University of Virginia, United States); Tihamer Orban (Joslin Diabetes Center, United States); Craig Orłowski (University of Rochester Medical Center, United States); Andrew Paterson (University of Toronto, Canada); Massimo Pietropaolo (University of Michigan Medical School, United States); Catherine Pihoker (Children's Hospital and Regional Medical Center, United States); Constantin Polychronakos<sup>11,14</sup> (McGill University Health Center, Canada); Jeff Post<sup>3</sup> (Roche Molecular Systems, United States); Daniel Postellon (Helen DeVos Children's Hospital, United States); Alberto Pugliese<sup>9,14</sup> (University of Miami, United States); HuiQi Qu<sup>14</sup> (Montreal Children's Hospital, Canada); Teresa Quattrin (Women and Children's Hospital of Buffalo, United States); Mark Rappaport (Pediatric Endocrine Associates, United States); Philip Raskin (University of Texas Southwestern Medical Center, United States); Heather Risbeck<sup>4</sup> (Fred Hutchinson Cancer Research Center, United States); Henry Rodriguez (Riley Hospital for Children, United States); Luisa Rodriguez (Baylor College of Medicine, United States); Michelle Rogers<sup>4</sup> (Fred Hutchinson Cancer Research Center, United States); Bill Russell (Vanderbilt University, United States); Desmond Schatz (University of Florida, United States); Carla Scott (University of Texas Health Science Center at San Antonio, United States); Jin-Xiong She<sup>14</sup> (Medical College of Georgia, United States); Dorothy Shulman (University of South Florida, United States); Leslie Soyka (University of Massachusetts Memorial Center, United States); Phyllis Speiser (Schneider Children's Hospital, United States); Harold Starkman (Atlantic Health System, United States); Andrea Steck<sup>14</sup> (Barbara Davis Center for Childhood Diabetes, United States); Sarah Stender (University of Tennessee, United States); Lorraine Stratton (University of Arizona, United States); Daniel Sur<sup>3</sup> (Roche Molecular Systems, United States); Shayne Taback (University of Manitoba, United States); Kathryn Thrailkill (Arkansas Children's Hospital, United States); Ellen Toth (University of Alberta, Canada); Patricia Trymbiski (Doylestown Hospital, United States); Eva Tsalikian (University of Iowa, United States); Katherine Vertachnik<sup>4</sup> (Fred Hutchinson Cancer Research Center, United States); Jack Wahlen (Endocrine Research Specialists, United States); Xujing Wang (Max McGee National Research Center of Juvenile Diabetes, United States); Sandra Weber (Greenville Hospital System, United States); Diane Wherrett (Hospital for Sick Children, Canada); Steven Willi (Children's Hospital of Philadelphia, United States); Darrell Wilson (Stanford University, United States); Jerry Youkey (Greenville Hospital System, United States); Neal Young (National Institutes of Health, United States); Liping Yu<sup>2</sup> (Barbara Davis Center for Childhood Diabetes, United States); Donald Zimmerman (Children's Memorial Hospital, United States)

**United Kingdom Network:** Ellen Adlem<sup>4</sup> (University of Cambridge, United Kingdom); James Allen<sup>4</sup> (University of Cambridge, United Kingdom); Judy Brown<sup>4</sup> (University of

Cambridge, United Kingdom); Oliver Burren<sup>4</sup> (University of Cambridge, United Kingdom); Pamela Clarke<sup>4</sup> (University of Cambridge, United Kingdom); David Clayton<sup>4</sup> (University of Cambridge, United Kingdom); Gillian Coleman<sup>4</sup> (University of Cambridge, United Kingdom); Jason Cooper<sup>4</sup> (University of Cambridge, United Kingdom); Francesco Cucca<sup>6</sup> (University of Sassari, United Kingdom); Simon Duley<sup>4</sup> (University of Cambridge, United Kingdom); David Dunger<sup>11</sup> (University of Cambridge, United Kingdom); Vin Everett<sup>4</sup> (University of Cambridge, United Kingdom); Matthew Hardy<sup>4</sup> (University of Cambridge, United Kingdom); Deborah Harrison<sup>4</sup> (University of Cambridge, United Kingdom); Inge Harrison<sup>4</sup> (University of Cambridge, United Kingdom); Steve Hawkins<sup>4</sup> (University of Cambridge, United Kingdom); Barry Healy<sup>4</sup> (University of Cambridge, United Kingdom); Simon Hood<sup>4</sup> (University of Cambridge, United Kingdom); Simon Howell<sup>8</sup> (King's College, United Kingdom); Meeta Maisuria<sup>4</sup> (University of Cambridge, United Kingdom); William Meadows<sup>4</sup> (University of Cambridge, United Kingdom); Trupti Mistry<sup>4</sup> (University of Cambridge, United Kingdom); Sarah Nutland<sup>4,5</sup> (University of Cambridge, United Kingdom); Nigel Ovington<sup>4</sup> (University of Cambridge, United Kingdom); Helen Schuilenburg<sup>4</sup> (University of Cambridge, United Kingdom); Anna Simpson<sup>4</sup> (University of Cambridge, United Kingdom); Luc Smink<sup>7</sup> (University of Cambridge, United Kingdom); Helen Stevens<sup>4</sup> (University of Cambridge, United Kingdom); Niall Taylor<sup>4</sup> (University of Cambridge, United Kingdom); John Todd<sup>1,4,12,14,15</sup> (University of Cambridge, United Kingdom); Jaakko Tuomilehto (National Public Health Institute, Finland); Neil Walker<sup>4,5</sup> (University of Cambridge, United Kingdom); Barry Widmer<sup>4</sup> (University of Cambridge, United Kingdom); Mark Wilson<sup>4</sup> (University of Cambridge, United Kingdom); Heather Withers<sup>5,10</sup> (University of Cambridge, United Kingdom)

**Coordinating Center:** Mark Brown (Wake Forest University Health Sciences, United States); Wei-Min Chen (University of Virginia, United States); Arnetta Crews (Wake Forest University Health Sciences, United States); Jason Griffin (Wake Forest University Health Sciences, United States); Mark Hall<sup>8</sup> (Wake Forest University Health Sciences, United States); Teresa Harnish (Wake Forest University Health Sciences, United States); John Hepler (Wake Forest University Health Sciences, United States); Joan Hilner<sup>5,8,10</sup> (Wake Forest University Health Sciences, United States); Nancy King<sup>8</sup> (Wake Forest University Health Sciences, United States); Kurt Lohman (Wake Forest University Health Sciences, United States); Lingyi Lu (Wake Forest University Health Sciences, United States); Josyf Mychaleckyj<sup>5,7</sup> (University of Virginia, United States); Jay Nail (Wake Forest University Health Sciences, United States); Letitia Perdue<sup>5,10</sup> (Wake Forest University Health Sciences, United States); June Pierce (Wake Forest University Health Sciences, United States); David Reboussin<sup>5,6</sup> (Wake Forest University Health Sciences, United States); Stephen Rich<sup>1,12,14</sup> (University of Virginia, United States); Scott Rushing (Wake Forest University Health Sciences, United States); Michele Sale (University of Virginia, United States); Elizabeth Sides<sup>5,10</sup> (Wake Forest University Health Sciences, United States); Beverly Snively<sup>11</sup> (Wake Forest University Health Sciences, United States); Hoa Teuschler (Wake Forest University Health Sciences, United States); Goodrich Theil (Wake Forest University Health Sciences, United States); Dustin Williams (Wake Forest University Health Sciences, United States)

**Project Office:** Beena Akolkar<sup>1,5,6,9,12</sup> (National Institute of Diabetes and Digestive and Kidney Diseases/National Institutes of Health, United States); Catherine McKeon<sup>8</sup> (National Institute of Diabetes and Digestive and Kidney Diseases/National Institutes of Health, United States); Concepcion Nierras<sup>9</sup> (Juvenile Diabetes Research Foundation International, United States); Elizabeth Thomson<sup>8</sup> (National Human Genome Research Institute/National Institutes of Health, United States)



**Other Contributors:** David Altshuler (Whitehead Institute for Biomed Research, United States); Kinman Au<sup>14</sup> (Medical College of Georgia, United States); Steve Bain<sup>14</sup> (University of Wales Swansea, United Kingdom); Lisa Barcellos<sup>13</sup> (University of California at Berkeley, United States); Sandra Barral<sup>13</sup> (Rockefeller University, United States); Tim Becker<sup>13</sup> (Karolinska Institutet, Sweden); Farren Briggs<sup>13</sup> (University of California at Berkeley, United States); Paola Bronson<sup>13</sup> (University of California at Berkeley, United States); Mark Daly<sup>7,13</sup> (Massachusetts General Hospital, United States); Paul de Bakker<sup>13</sup> (Massachusetts General Hospital, United States); Panos Deloukas<sup>13</sup> (Wellcome Trust Sanger Institute, United Kingdom); Bernie Devlin<sup>13</sup> (University of Pittsburgh, United States); Morten Chrisoph Eike<sup>13,14</sup> (Institute of Immunology, Norway); Leigh Field<sup>14</sup> (University of British Columbia, Canada); Stacey Gabriel (Broad Institute of MIT and Harvard, United States); Nikhil Garge<sup>14</sup> (Medical College of Georgia, United States); Silvana Gaudieri<sup>13</sup> (Murdoch University, Australia); Ben Goldstein<sup>13</sup> (University of California at Berkeley, United States); Clara Gorodezky (INDRE SSA, Mexico); Sara Hamon<sup>13</sup> (Rockefeller University, United States); Chungsheng He<sup>13</sup> (Rockefeller University, United States); Joanna Howson<sup>4,13,14</sup> (University of Cambridge, United Kingdom); Keith Humphreys<sup>13</sup> (Karolinska Institutet, Sweden); Ian James<sup>13</sup> (Murdoch University, Australia); Mark Lathrop<sup>13</sup> (Centre National de Genotypage, France); Benedicte Alexandra Lie<sup>13</sup> (University of Oslo, Norway); Dawei Li<sup>13</sup> (Rockefeller University, United States); Steven Mack<sup>13</sup> (Roche Molecular Systems, United States); Ralph McGinnis<sup>13</sup> (Wellcome Trust Sanger Institute, United Kingdom); Elizabeth McKinnon<sup>13</sup> (Murdoch University, Australia); William McLaren<sup>13</sup> (Wellcome Trust Sanger Institute, United Kingdom); David Nolan<sup>13</sup> (Murdoch University, Australia); Marita Olsson<sup>13</sup> (Karolinska Institutet, Sweden); Jurg Ott<sup>13</sup> (Rockefeller University, United States); David Owerbach (Baylor College of Medicine, United States); Chris Patterson<sup>14</sup> (Queen's University Belfast, United Kingdom); Robert Podolsky<sup>14</sup> (Medical College of Georgia, United States); Patricia Ramsay<sup>13</sup> (University of California at Berkeley, United States); Venkatesh Rangantah<sup>13</sup> (Wellcome Trust Sanger Institute, United Kingdom); Neil Risch<sup>13</sup> (University of California at San Francisco, United States); Kjersti Skjold Ronningen<sup>14</sup> (Norwegian Institute of Public Health, Norway); Xiarong Shao<sup>13</sup> (University of California at Berkeley, United States); Richard Single<sup>13</sup> (University of Vermont, United States); Michael Steffes<sup>5</sup> (University of Minnesota, United States); Glenys Thomson<sup>13</sup> (University of California at Berkeley, United States); Ana Maria Valdes<sup>5,13</sup> (Lartech, Italy); Claire Vandiedonck<sup>13</sup> (Wellcome Trust Centre for Human Genetics, United Kingdom); Pam Whittaker (Wellcome Trust Sanger Institute, United Kingdom); Qingrun Zhang<sup>13</sup> (Beijing Institute of Genomics, China)

**Study Roles:** <sup>1</sup>Steering Committee, <sup>2</sup>Autoantibody Laboratory, <sup>3</sup>HLA Genotyping Laboratory, <sup>4</sup>Network DNA Repository, <sup>5</sup>Quality Control Committee, <sup>6</sup>Access Committee, <sup>7</sup>Bioinformatics Committee, <sup>8</sup>Ethical Legal and Social Issues Committee, <sup>9</sup>Molecular Technology Committee, <sup>10</sup>Network Coordinators Committee, <sup>11</sup>Phenotyping and Recruitment Committee, <sup>12</sup>Publications and Presentations Committee, <sup>13</sup>MHC Fine Mapping Working Group, <sup>14</sup>Rapid Response Working Group, <sup>15</sup>Network Principal Investigator
